# Supplementary material for: Role of α-hydroxycarboxylic acids in the construction of supramolecular assemblies of nickel(ii) complexes with nitrogen donor coligands
Source: Royal Society of Chemistry journal article supplement (doi:10.1039/b904939h), 2009-01-01
Supplement: b904939h.pdf [file b904939h.pdf]

**Electronic Supplementary Information**

**Role of  $\alpha$ -Hydroxycarboxylic Acids in the Construction of Supramolecular Assemblies of Nickel(II) Complexes with Nitrogen Donor Coligands**

*Partha Halder, Biswarup Chakraborty, Priya Ranjan Banerjee, Ennio Zangrando\* and Tapan Kanti Paine\**

**Fig. S1** TGA curve for **1**

**Fig. S2** TGA curve for **2R**

**Fig. S3** TGA curve for **3**

**Fig. S4** TGA curve for **4**•H<sub>2</sub>O

**Fig. S5** TGA curve for **5S**•0.50(CH<sub>3</sub>OH)•0.25(AP)

**Fig. S6** TGA curve for **6**•2.5 CH<sub>3</sub>OH

**Fig. S7** CD spectra of **2R** (----) and **2S** (—) in CH<sub>2</sub>Cl<sub>2</sub> at room temperature

**Fig. S8** CD spectra for **5R** (—) and **5S**(----) in MeOH at room temperature

**Fig. S9** PXRD pattern for **1**

**Fig. S10** PXRD pattern for **2**

**Fig. S11** PXRD pattern for **3**

**Fig. S12** PXRD pattern for **4**

**Fig. S13** PXRD pattern for **5**

**Fig. S14** PXRD pattern for **6**

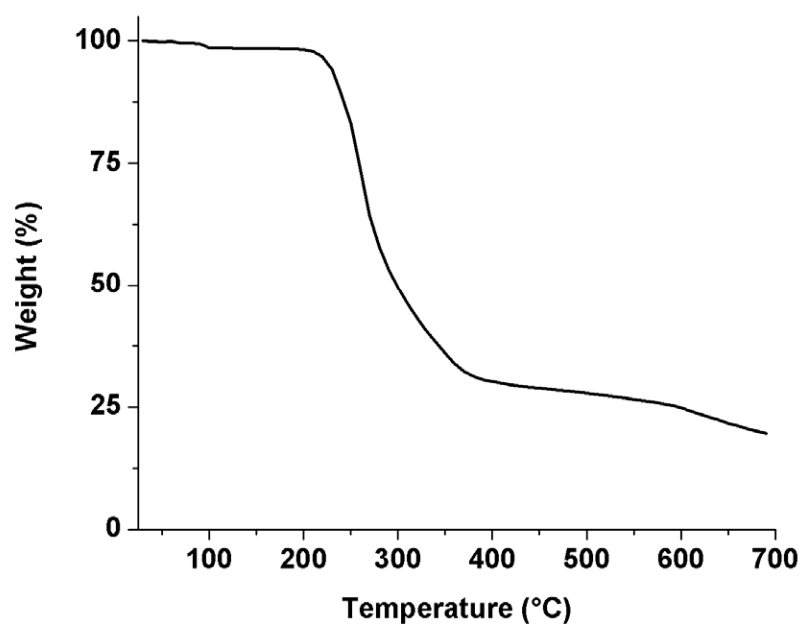

**Fig. S1** TGA curve for **1**

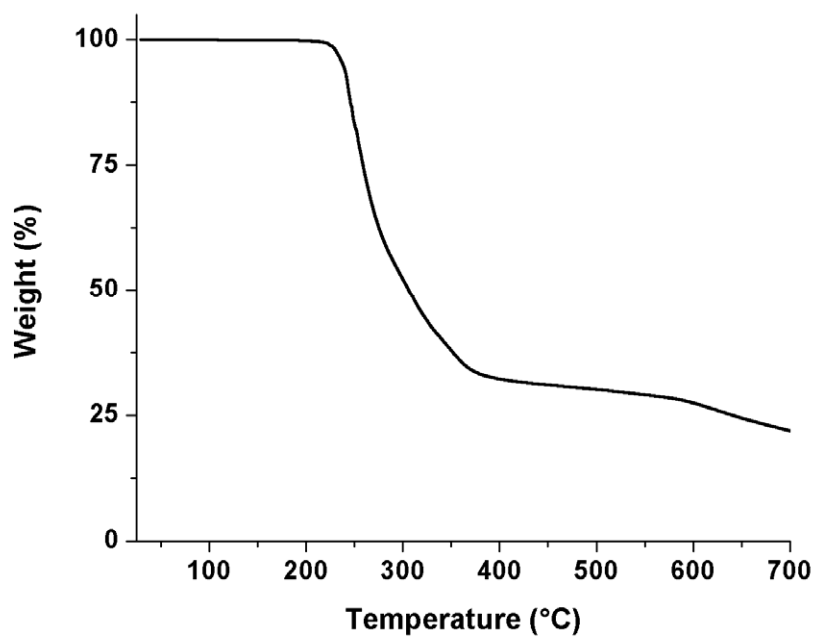

**Fig. S2** TGA curve for **2R**

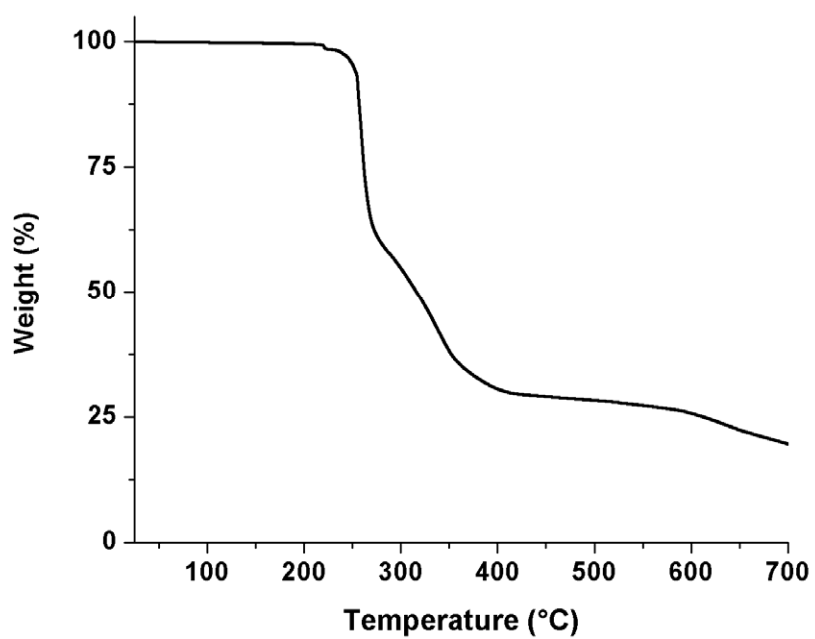

**Fig. S3** TGA curve for **3**

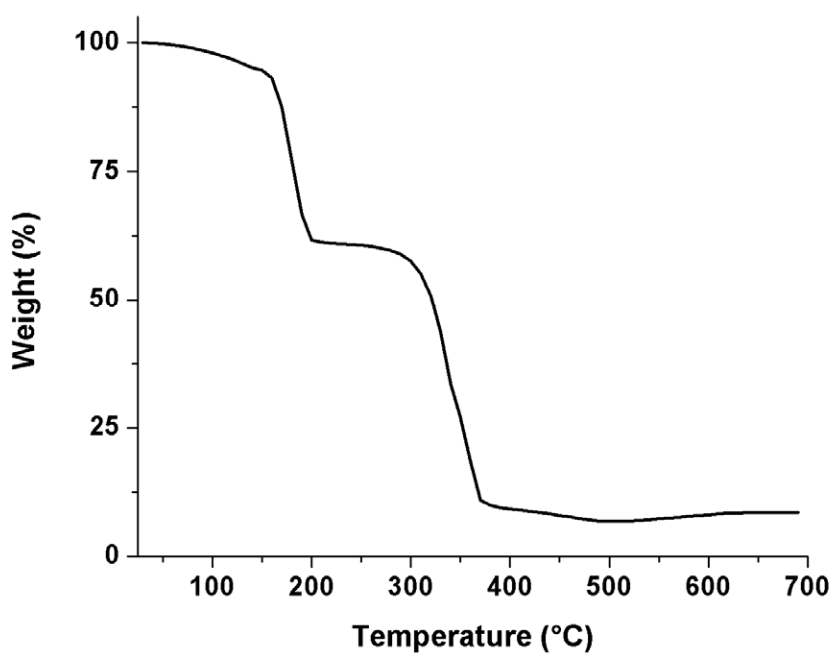

**Fig. S4** TGA curve for **4•H<sub>2</sub>O**

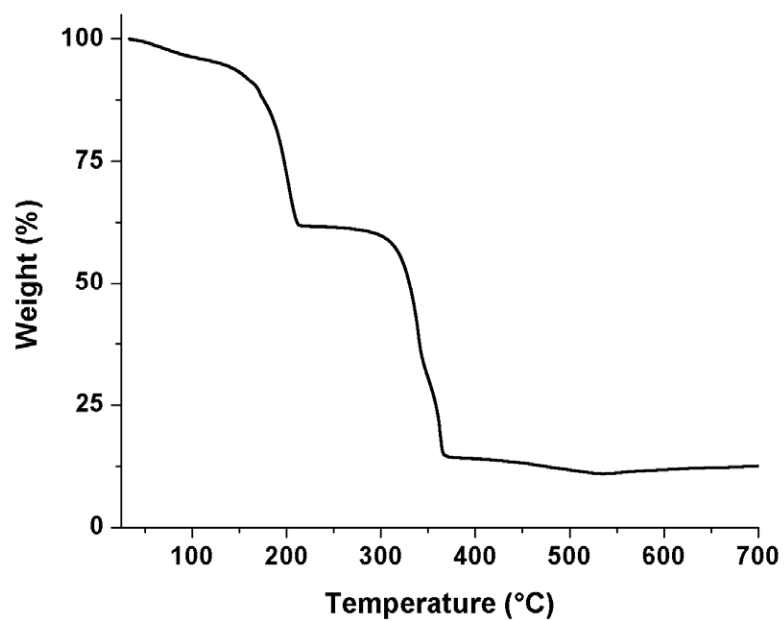

Fig. S5 TGA curve for **5S**•0.50(CH<sub>3</sub>OH)•0.25(AP)

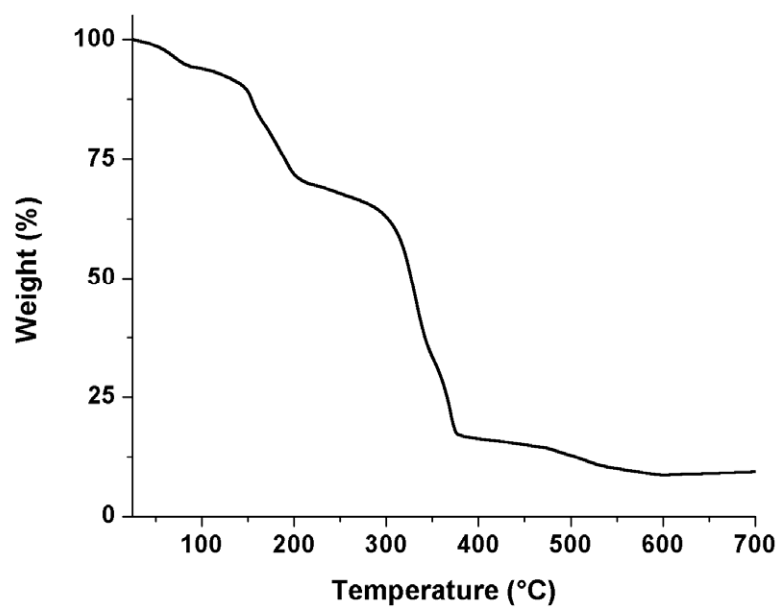

Fig. S6 TGA curve for **6**•2.5 CH<sub>3</sub>OH

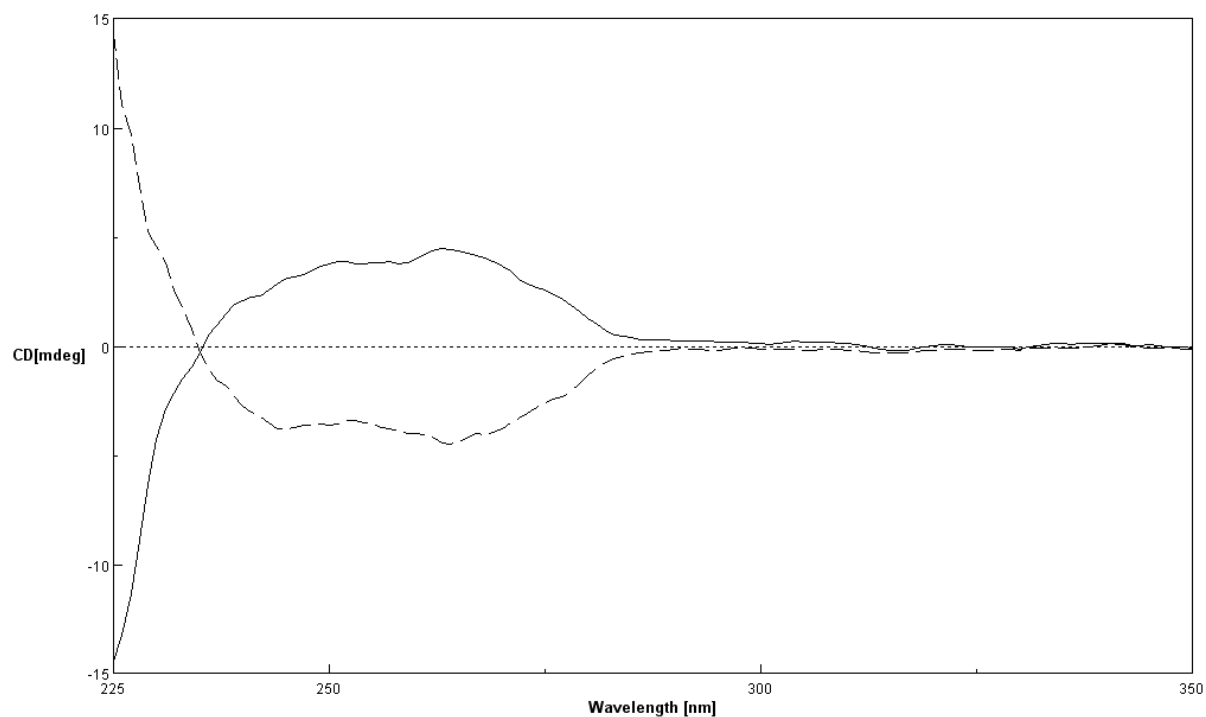

**Fig. S7** CD spectra of **2R** (----) and **2S** (—) in CH<sub>2</sub>Cl<sub>2</sub> at room temperature

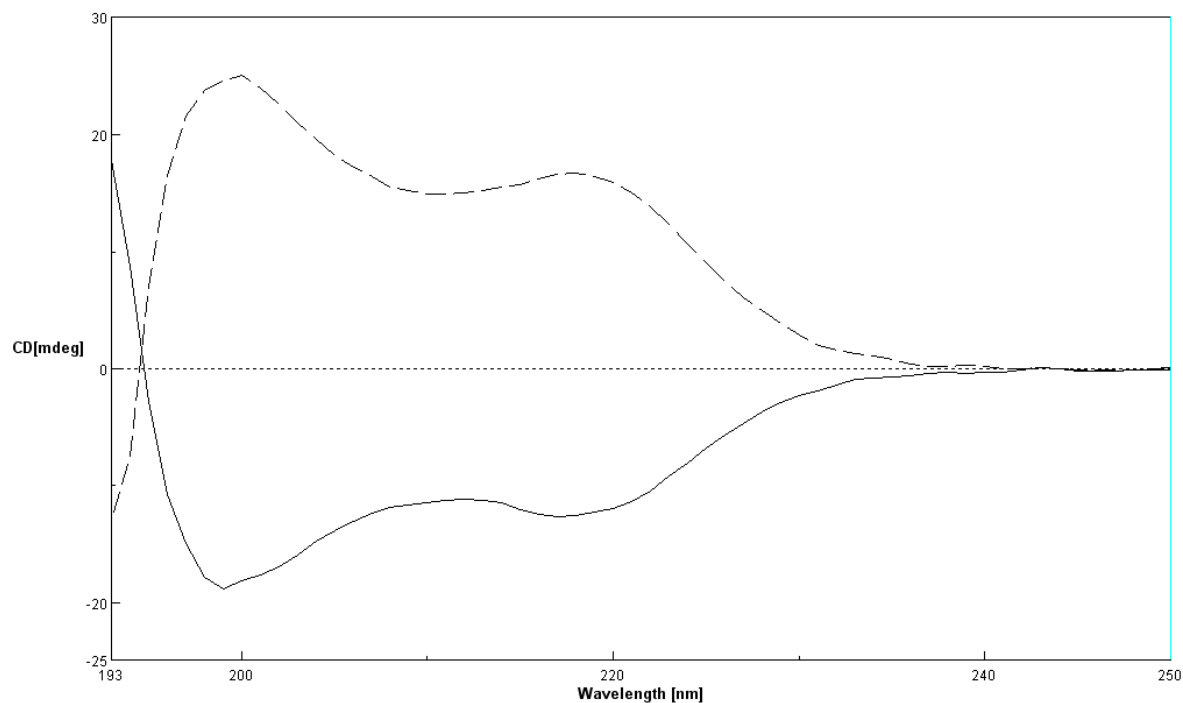

**Fig. S8** CD spectra for **5R** (—) and **5S** (----) in MeOH at room temperature

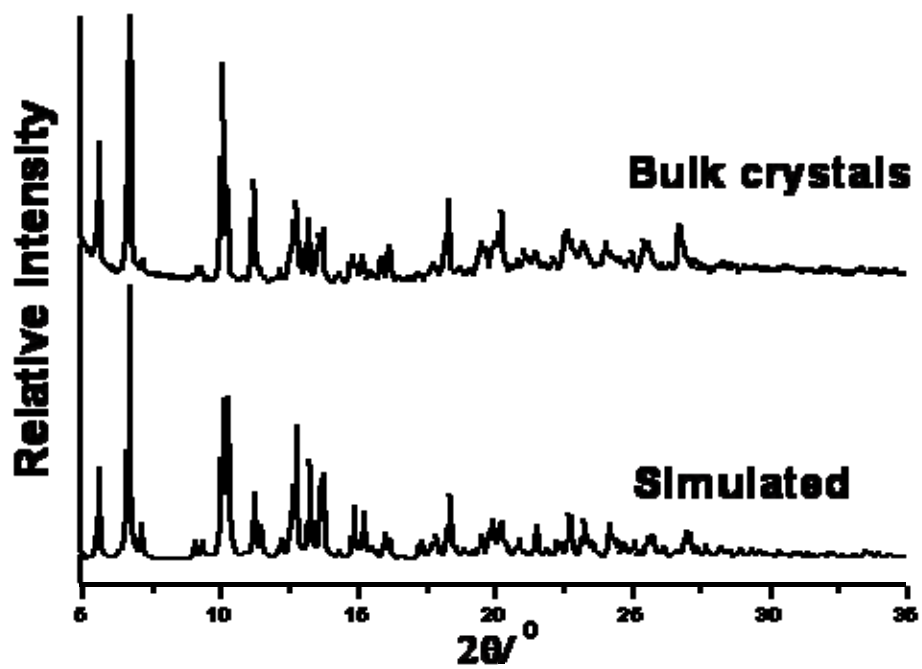

Fig. S9 PXRD pattern for 1

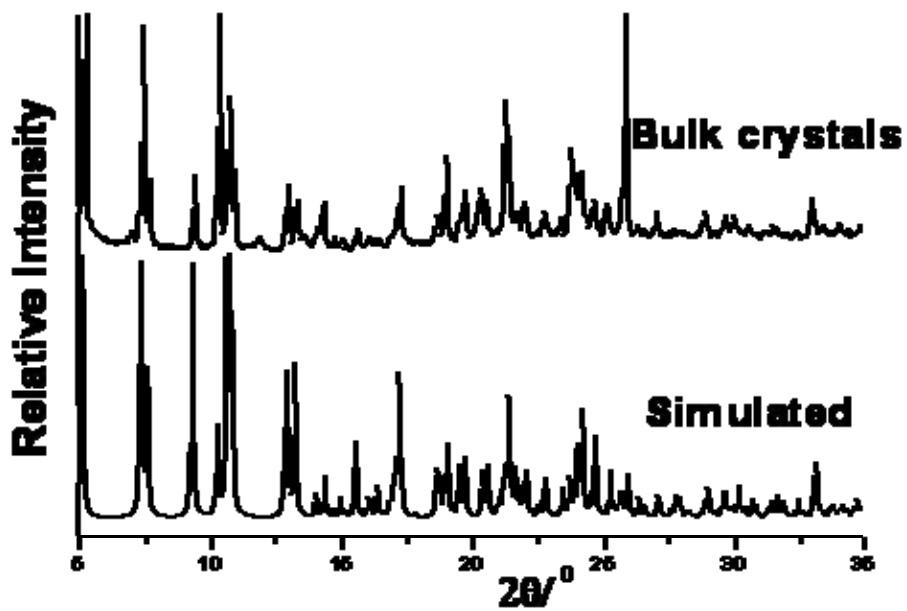

Fig. S10 PXRD pattern for 2

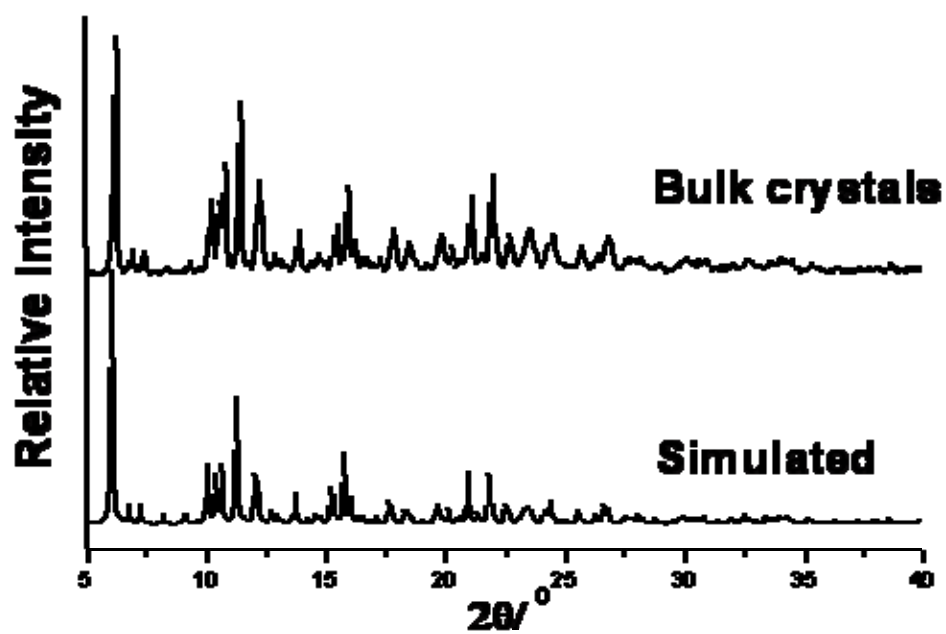

Fig. S11 PXR D pattern for 3

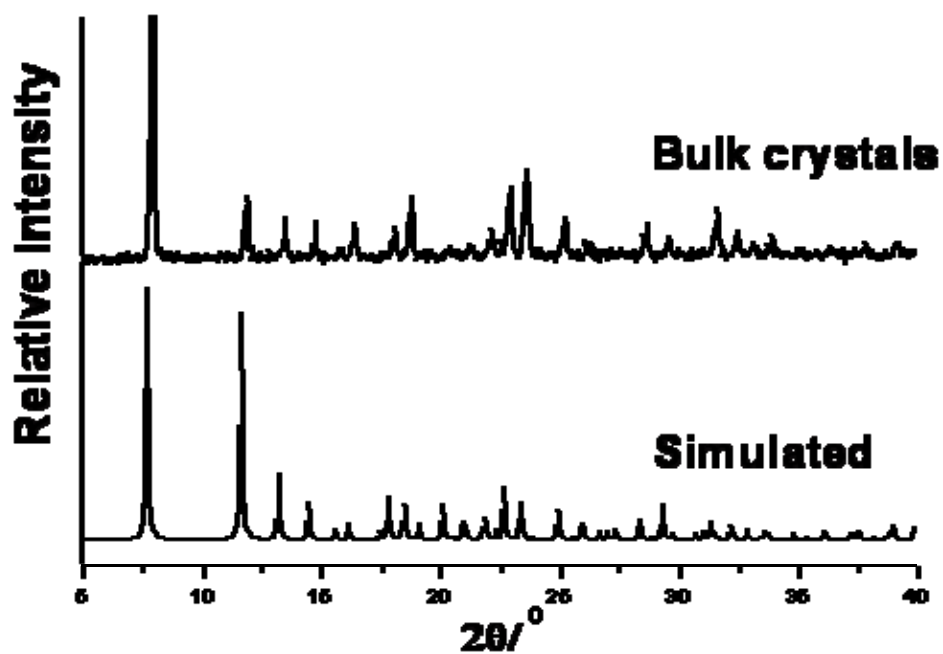

Fig. S12 PXR D pattern for 4

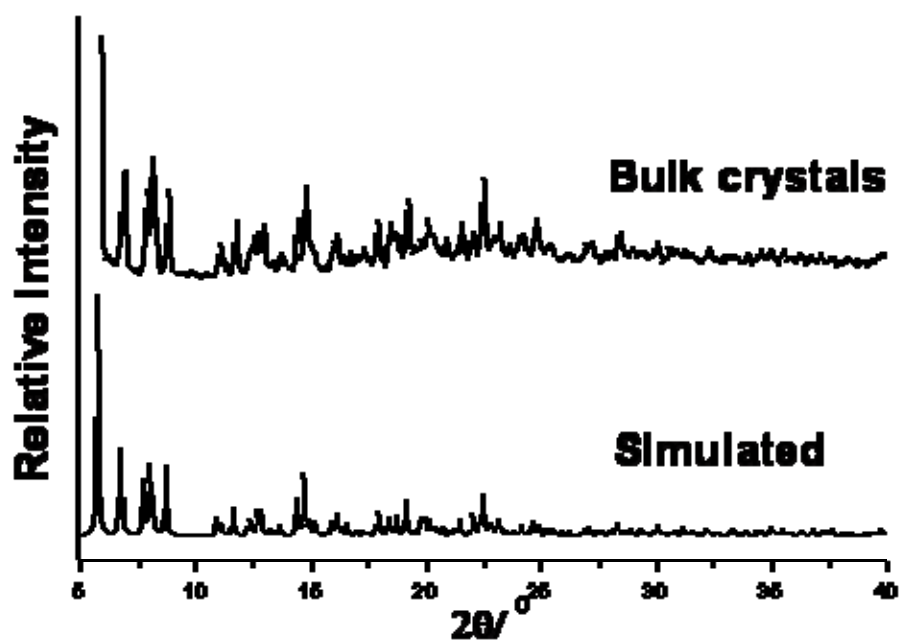

Fig. S13 PXRd pattern for 5

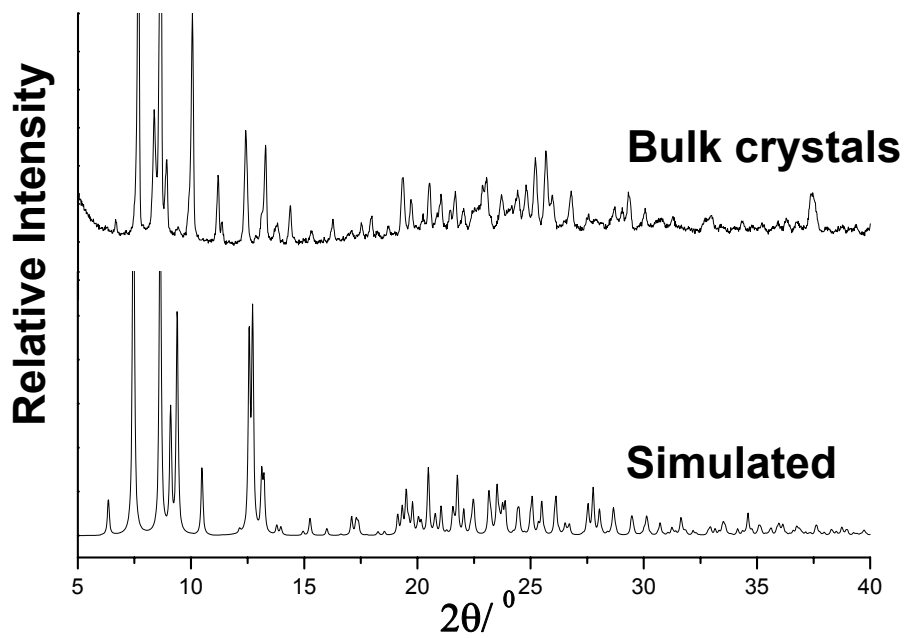

Fig. S14 PXRd pattern for 6
